# Supplementary material for: Regulation of follistatin-like 3 expression by miR-486-5p modulates gastric cancer cell proliferation, migration and tumor progression
Source: publisher site journal article supplement (doi:10.18632/aging.203412), 2021-08-23
Supplement: Supplementary file [file aging-v13i16-203412-supplementary-material-SD1.pdf]

SUPPLEMENTARY FIGURES

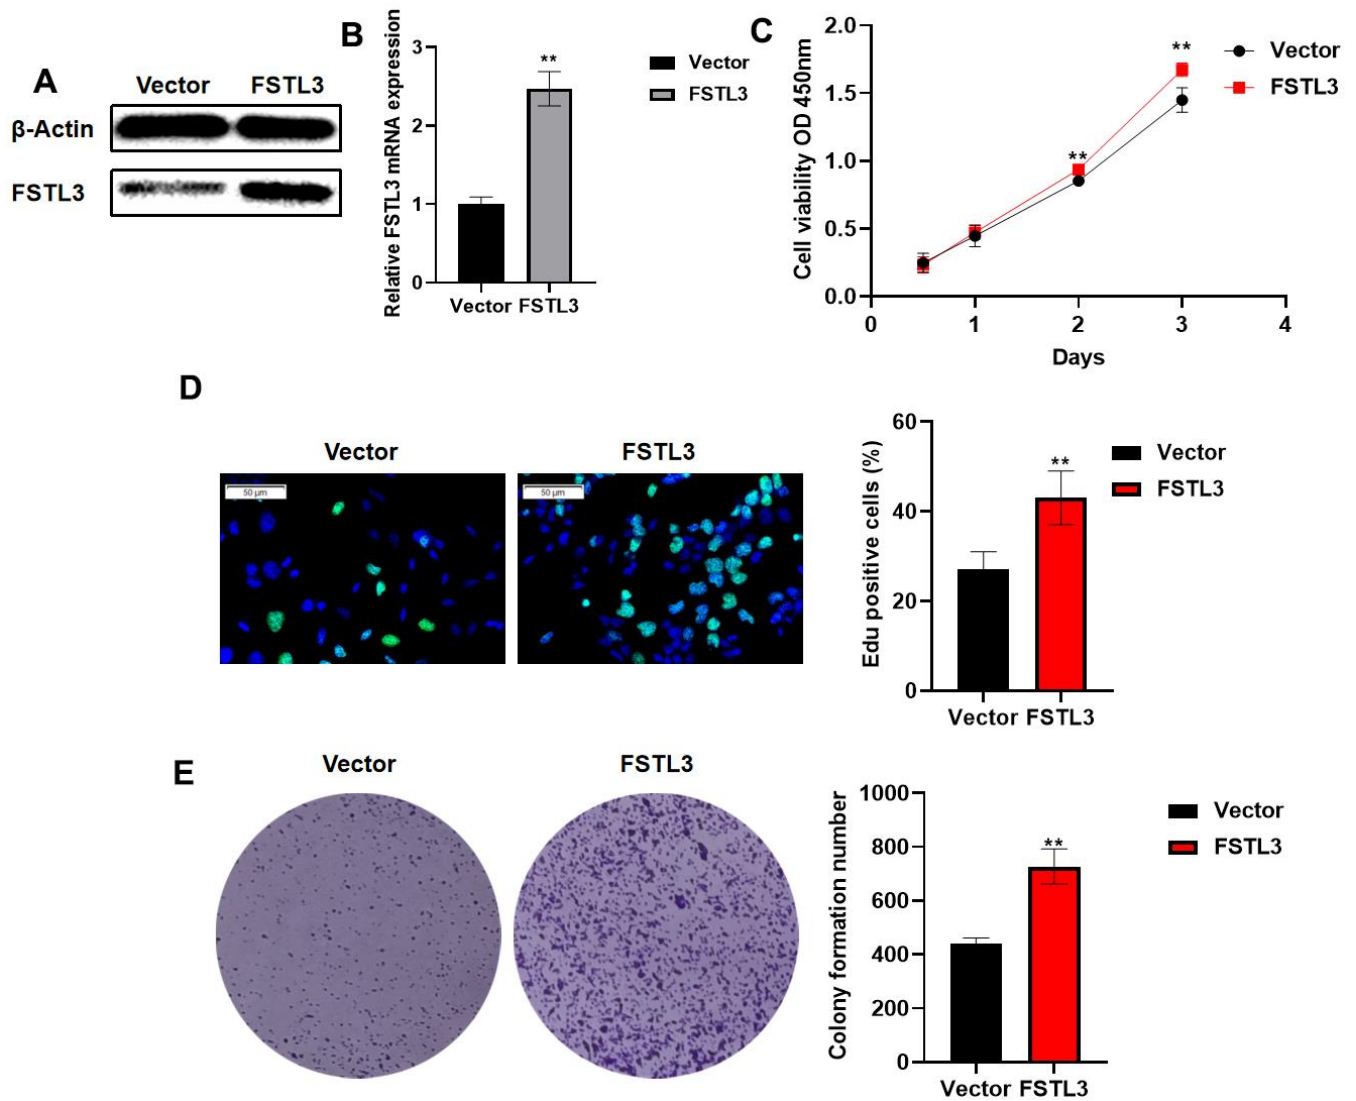

**Supplementary Figure 1. FSTL3 overexpression promotes GES1 cell viability and proliferation.** (A) Overexpression of FSTL3 in GES1 cells monitored using Western blotting; monitoring the housekeeping protein  $\beta$ -actin was used as a loading control. (B) Overexpression of FSTL3 in GES1 cells monitored using qRT-PCR. (C) Overexpression of FSTL3 in GES1 cells assessed by using the cell viability assay. (D) FSTL3 overexpression in GES1 cells was assessed for effects on cell proliferation using EdU incorporation assay. Cell proliferation was determined by EdU staining. (E) FSTL3 overexpression and effects on MGC-803 cell colony formation. Error bars indicate  $\pm$ SEM; significance indicated by asterisks, \* $P$ <0.05, \*\* $P$ <0.01, \*\*\* $P$ <0.001; number of experiments,  $n=3$ .

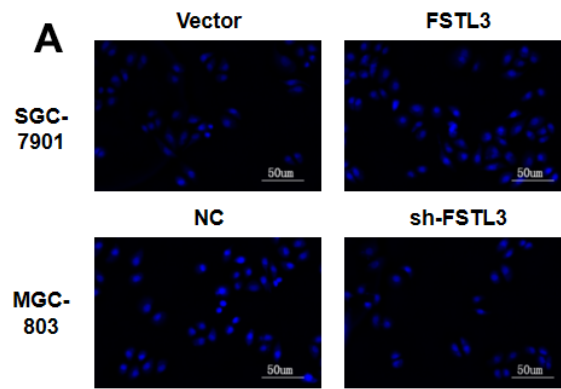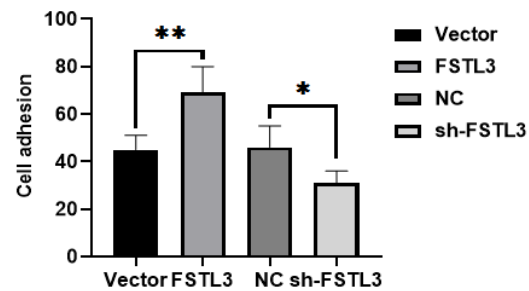

**B**

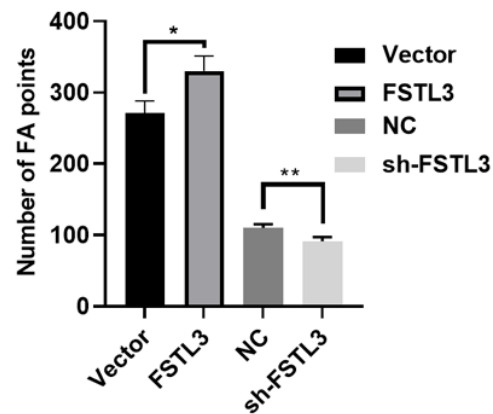

**Supplementary Figure 2. FSTL3 overexpression promotes cell adhesion activity and the number of focal adhesion.** (A) FSTL3 overexpression in MGC-803 cells was assessed for effects on cell adhesion ability. The adhesion ability of MGC-803 cells is expressed as an adhesion ratio. (B) FSTL3 overexpression and effects on the number of MGC-803 cell adhesion spots. Error bars indicate +SEM; significance indicated by asterisks, \* $P < 0.05$ , \*\* $P < 0.01$ , \*\*\* $P < 0.001$ ; number of experiments,  $n = 3$ .
